# Supplementary material for: Simulation Studies Provide Evidence of Aerosol Transmission of SARS-CoV-2 in a Multi-Story Building via Air Supply, Exhaust and Sanitary Pipelines
Source: MDPI journal article supplement (doi:10.3390/ijerph19031532), 2022-01-29
Supplement: s1 [file s1]

**Figure 1. A data** The changes of particle concentration over time at 0.5 $\mu$ m (scenarios 1), PM<sub>10</sub> (scenarios 2) in different rooms . A.scenarios 1; B.scenarios 2.

| Particle Concentration/5 $\mu$ m/particle/L |          |          |          |
|---------------------------------------------|----------|----------|----------|
| Time/min                                    | Room 552 | Room 652 | Room 752 |
| 0                                           | 98       | 47       | 38       |
| 10                                          | 77       | 36       | 49       |
| 20                                          | 47       | 32       | 37       |
| 30                                          | 338      | 203      | 107      |
| 40                                          | 107      | 56       | 77       |
| 50                                          | 77       | 26       | 47       |
| 60                                          | 82       | 39       | 52       |
| 70                                          | 69       | 201      | 73       |
| 80                                          | 60       | 81       | 120      |
| 90                                          | 145      | 24       | 99       |

**Figure 1. B data** The changes of particle concentration over time at 0.5 $\mu$ m (scenarios 1), PM<sub>10</sub> (scenarios 2) in different rooms . A.scenarios 1; B.scenarios 2.

| Particle Concentration/PM <sub>10</sub> /mg/m <sup>3</sup> |          |          |          |          |          |          |
|------------------------------------------------------------|----------|----------|----------|----------|----------|----------|
| Time/min                                                   | Room 510 | Room 511 | Room 552 | Room 553 | Room 652 | Room 705 |
| 0                                                          | 0.02     | 0.016    | 0.016    | 0.009    | 0.013    | 0.008    |
| 10                                                         | 1.059    | 1.001    | 0.449    | 0.014    | 0.012    | 0.01     |
| 20                                                         | 1.162    | 1.061    | 0.732    | 0.019    | 0.011    | 0.008    |
| 30                                                         | 1.219    | 1.089    | 0.789    | 0.054    | 0.014    | 0.008    |
| 40                                                         | 1.161    | 1.112    | 0.849    | 0.091    | 0.018    | 0.008    |
| 50                                                         | 1.319    | 0.744    | 1.05     | 0.123    | 0.022    | 0.008    |
| 60                                                         | 1.44     | 1.183    | 1.25     | 0.154    | 0.026    | 0.008    |
| 70                                                         | 1.465    | 1.54     | 1.06     | 0.22     | 0.029    | 0.01     |
| 80                                                         | 1.484    | 1.16     | 0.981    | 0.227    | 0.033    | 0.01     |
| 90                                                         | 0.925    | 1.868    | 0.901    | 0.223    | 0.035    | 0.012    |
| 100                                                        | 0.69     | 1.21     | 1.12     | 0.201    | 0.037    | 0.013    |
| 110                                                        | 0.834    | 1.108    | 0.864    | 0.186    | 0.036    | 0.015    |
| 120                                                        | 0.968    | 1.046    | 0.67     | 0.168    | 0.034    | 0.016    |

|     |       |       |       |       |       |       |
|-----|-------|-------|-------|-------|-------|-------|
| 130 | 1.221 | 1.275 | 0.771 | 0.146 | 0.033 | 0.015 |
| 140 | 1.425 | 1.423 | 0.858 | 0.124 | 0.032 | 0.016 |
| 150 | 1.706 | 1.598 | 0.832 | 0.111 | 0.03  | 0.015 |
| 160 | 1.768 | 1.717 | 0.803 | 0.099 | 0.028 | 0.015 |
| 170 | 1.805 | 1.704 | 0.725 | 0.091 | 0.031 | 0.016 |
| 180 | 1.654 | 1.811 | 0.874 | 0.084 | 0.035 | 0.015 |
| 190 | 1.276 | 1.79  | 0.872 | 0.078 | 0.037 | 0.016 |
| 200 | 0.789 | 1.676 | 0.87  | 0.072 | 0.04  | 0.017 |
| 210 | 1.188 | 1.511 | 0.905 | 0.072 | 0.041 | 0.017 |
| 220 | 1.14  | 1.448 | 0.914 | 0.072 | 0.043 | 0.016 |
| 230 | 1.077 | 1.209 | 0.98  | 0.072 | 0.048 | 0.018 |
| 240 | 0.79  | 1.187 | 1.2   | 0.072 | 0.054 | 0.018 |

**Figure S1. data** The variation of particle concentration (0.5 $\mu$ m, 5 $\mu$ m, PM<sub>10</sub>) over time in different rooms in the scenario of toilet flushing.

| Time/min | Particle Concentration |          |          |                      |          |          |                                     |          |          |
|----------|------------------------|----------|----------|----------------------|----------|----------|-------------------------------------|----------|----------|
|          | 0.5 $\mu$ m/particle/L |          |          | 5 $\mu$ m/particle/L |          |          | PM <sub>10</sub> /mg/m <sup>3</sup> |          |          |
|          | Room 552               | Room 652 | Room 752 | Room 552             | Room 652 | Room 752 | Room 552                            | Room 652 | Room 752 |
| 0        | 6166                   | 5235     | 5934     | 98                   | 47       | 38       | 0.02                                | 0.018    | 0.018    |
| 10       | 6857                   | 5094     | 5977     | 77                   | 36       | 49       | 0.018                               | 0.018    | 0.016    |
| 20       | 5371                   | 5808     | 5306     | 47                   | 32       | 37       | 0.018                               | 0.019    | 0.018    |
| 30       | 13612                  | 11288    | 5357     | 338                  | 203      | 107      | 0.024                               | 0.026    | 0.016    |
| 40       | 8437                   | 6443     | 5053     | 107                  | 56       | 77       | 0.016                               | 0.026    | 0.017    |
| 50       | 5286                   | 4778     | 4560     | 77                   | 26       | 47       | 0.015                               | 0.026    | 0.016    |
| 60       | 4758                   | 4748     | 4421     | 82                   | 39       | 52       | 0.016                               | 0.026    | 0.018    |
| 70       | 4182                   | 8465     | 4305     | 69                   | 201      | 73       | 0.015                               | 0.026    | 0.016    |
| 80       | 3553                   | 6314     | 4288     | 60                   | 81       | 120      | 0.014                               | 0.019    | 0.016    |
| 90       | 3722                   | 4029     | 4054     | 145                  | 24       | 99       | 0.018                               | 0.017    | 0.015    |

**Figure S2. data.** The changes of particle concentration over time at 0.3µm, 0.5µm, 5µm, PM10 in different rooms in the scenario of respiration simulation.

|              | Particle Concentration                  |                      |                      |                                        |                           |                           |                                         |                           |                           |                                         |                           |                           |                                         |                           |                         |                                         | Room<br>553 |
|--------------|-----------------------------------------|----------------------|----------------------|----------------------------------------|---------------------------|---------------------------|-----------------------------------------|---------------------------|---------------------------|-----------------------------------------|---------------------------|---------------------------|-----------------------------------------|---------------------------|-------------------------|-----------------------------------------|-------------|
|              | Room510                                 |                      |                      |                                        | Room511                   |                           | Room552                                 |                           | Room652                   |                                         | Room705                   |                           |                                         |                           |                         |                                         |             |
| Time/<br>min | PM <sub>10</sub> /<br>mg/m <sup>3</sup> | 0.3µm/p<br>article/L | 0.5µm/p<br>article/L | P<br>M<br>10/<br>mg/<br>m <sup>3</sup> | 0.3µm/<br>parti-<br>cle/L | 0.5µm/<br>parti-<br>cle/L | PM <sub>10</sub> /<br>mg/m <sup>3</sup> | 0.3µm/<br>parti-<br>cle/L | 0.5µm/<br>parti-<br>cle/L | PM <sub>10</sub> /<br>mg/m <sup>3</sup> | 0.3µm/<br>parti-<br>cle/L | 0.5µm/<br>parti-<br>cle/L | PM <sub>10</sub> /<br>mg/m <sup>3</sup> | 0.5µm/<br>parti-<br>cle/L | 5µm/p<br>arti-<br>cle/L | PM <sub>10</sub> /<br>mg/m <sup>3</sup> |             |
| 0            | 0.02                                    | 141635               | 8720                 | 0.016                                  | 158302                    | 11992                     | 0.016                                   | 86589                     | 4673                      | 0.013                                   | 145626                    | 9175                      | 0.008                                   | 3694                      | 28                      | 0.009                                   |             |
| 10           | 1.059                                   | 910572               | 569876               | 1.000                                  | 990742                    | 645957                    | 0.449                                   | 161423                    | 31983                     | 0.012                                   | 127724                    | 8163                      | 0.01                                    | 3391                      | 32                      | 0.014                                   |             |
| 20           | 1.162                                   | 904956               | 559223               | 1.061                                  | 1122566                   | 731502                    | 0.732                                   | 816957                    | 337421                    | 0.011                                   | 117946                    | 8153                      | 0.008                                   | 3717                      | 28                      | 0.019                                   |             |
| 30           | 1.219                                   | 849020               | 506719               | 1.089                                  | 1348875                   | 885438                    | 0.789                                   | 957718                    | 424519                    | 0.014                                   | 119096                    | 11055                     | 0.008                                   | 3857                      | 48                      | 0.054                                   |             |
| 40           | 1.161                                   | 820798               | 476423               | 1.112                                  | 1385195                   | 937887                    | 0.849                                   | 1018764                   | 441343                    | 0.018                                   | 127350                    | 18125                     | 0.008                                   | 4100                      | 44                      | 0.091                                   |             |
| 50           | 1.319                                   | 1038594              | 664463               | 0.744                                  | 1480621                   | 1025343                   | 1.05                                    | 1056363                   | 459163                    | 0.022                                   | 133875                    | 23026                     | 0.008                                   | 4103                      | 32                      | 0.123                                   |             |
| 60           | 1.44                                    | 1165221              | 730787               | 1.183                                  | 1470474                   | 975053                    | 1.25                                    | 1073958                   | 458395                    | 0.026                                   | 156283                    | 35166                     | 0.008                                   | 4345                      | 80                      | 0.154                                   |             |
| 70           | 1.465                                   | 1278016              | 800447               | 1.545                                  | 1504833                   | 980556                    | 1.06                                    | 1092979                   | 463866                    | 0.029                                   | 172632                    | 43530                     | 0.01                                    | 4859                      | 88                      | 0.22                                    |             |

|     |       |         |         |               |             |             |       |             |        |       |        |       |       |      |     |       |
|-----|-------|---------|---------|---------------|-------------|-------------|-------|-------------|--------|-------|--------|-------|-------|------|-----|-------|
| 80  | 1.484 | 1268194 | 783004  | 1.<br>16      | 150998<br>3 | 987687      | 0.981 | 110506<br>6 | 458781 | 0.033 | 183933 | 50338 | 0.01  | 5113 | 21  | 0.227 |
| 90  | 0.925 | 1255695 | 761298  | 1.<br>86<br>8 | 149145<br>5 | 920870      | 0.901 | 118074<br>3 | 521484 | 0.035 | 214961 | 63471 | 0.012 | 5363 | 60  | 0.223 |
| 100 | 0.69  | 1259902 | 763526  | 1.<br>21      | 153267<br>5 | 983052      | 1.12  | 127395<br>6 | 578447 | 0.037 | 228581 | 66193 | 0.013 | 5523 | 12  | 0.201 |
| 110 | 0.834 | 1289204 | 793556  | 1.<br>10<br>8 | 163998<br>2 | 100456<br>0 | 0.864 | 129580<br>7 | 602058 | 0.036 | 221476 | 63140 | 0.015 | 6157 | 84  | 0.186 |
| 120 | 0.968 | 1349683 | 813349  | 1.<br>04<br>6 | 167146<br>8 | 107214<br>6 | 0.67  | 130251<br>2 | 584607 | 0.034 | 202900 | 55898 | 0.016 | 6417 | 120 | 0.168 |
| 130 | 1.221 | 1391184 | 980017  | 1.<br>27<br>5 | 168337<br>2 | 117897<br>7 | 0.771 | 129384<br>9 | 573556 | 0.033 | 202819 | 53589 | 0.015 | 6548 | 71  | 0.146 |
| 140 | 1.425 | 1439021 | 998157  | 1.<br>42<br>3 | 167399<br>8 | 112932<br>8 | 0.858 | 128403<br>9 | 562387 | 0.032 | 193911 | 50429 | 0.016 | 6606 | 50  | 0.124 |
| 150 | 1.706 | 1440092 | 1029984 | 1.<br>59<br>8 | 169098<br>3 | 119032<br>4 | 0.832 | 127930<br>2 | 557645 | 0.03  | 192148 | 47261 | 0.015 | 6834 | 34  | 0.111 |
| 160 | 1.768 | 1452386 | 1037897 | 1.<br>71<br>7 | 170938<br>5 | 120338<br>5 | 0.803 | 125983<br>0 | 535238 | 0.028 | 196537 | 47600 | 0.015 | 7214 | 42  | 0.099 |
| 170 | 1.805 | 1466183 | 1044904 | 1.<br>70<br>4 | 170083<br>2 | 119660<br>9 | 0.725 | 120516<br>5 | 526680 | 0.031 | 195750 | 49587 | 0.016 | 8070 | 67  | 0.091 |
| 180 | 1.654 | 1449604 | 993750  | 1.<br>81<br>1 | 171065<br>4 | 121479<br>6 | 0.874 | 122394<br>3 | 548967 | 0.035 | 198368 | 51058 | 0.015 | 7982 | 63  | 0.084 |
| 190 | 1.276 | 1387750 | 946785  | 1.<br>79      | 170223<br>1 | 114773<br>2 | 0.872 | 120573<br>8 | 526755 | 0.037 | 202693 | 53127 | 0.016 | 8606 | 139 | 0.078 |
| 200 | 0.789 | 1307192 | 902418  | 1.            | 164309      | 108907      | 0.87  | 121948      | 538986 | 0.04  | 211955 | 56436 | 0.017 | 8559 | 64  | 0.072 |

|     |       |         |        |          |             |        |       |             |        |       |        |       |       |      |    |       |
|-----|-------|---------|--------|----------|-------------|--------|-------|-------------|--------|-------|--------|-------|-------|------|----|-------|
|     |       |         |        | 67<br>6  | 9           | 7      |       | 3           |        |       |        |       |       |      |    |       |
| 210 | 1.188 | 1255023 | 845773 | 1.<br>51 | 153226<br>5 | 982320 | 0.905 | 120896<br>4 | 526722 | 0.041 | 215093 | 49642 | 0.017 | 8822 | 86 | 0.072 |
| 220 | 1.14  | 1215167 | 744562 | 1.<br>44 | 142693<br>2 | 863354 | 0.914 | 119966<br>2 | 498476 | 0.043 | 211843 | 46755 | 0.016 | 9200 | 56 | 0.072 |
| 230 | 1.077 | 1174224 | 695664 | 1.<br>20 | 128701<br>0 | 725231 | 0.98  | 117792<br>0 | 465733 | 0.048 | 207093 | 44016 | 0.018 | 9462 | 45 | 0.072 |
| 240 | 0.79  | 1160098 | 658834 | 1.<br>18 | 123499<br>1 | 701922 | 1.2   | 116432<br>4 | 455223 | 0.054 | 206554 | 43590 | 0.018 | 9985 | 29 | 0.072 |

**Figure S3. data.** The changes of particle concentration at 0, 60, 180, 240 min at 0.5μm in the bedroom, bathroom, outdoor corridor of different rooms in the scenario of respiration simulation.

| Time/<br>min | Particle Concentration/0.5μm/particle/L |               |                     |              |               |                     |              |               |                     |              |               |              |               |              |               |  |
|--------------|-----------------------------------------|---------------|---------------------|--------------|---------------|---------------------|--------------|---------------|---------------------|--------------|---------------|--------------|---------------|--------------|---------------|--|
|              | Room510                                 |               |                     | Room511      |               |                     | Room552      |               |                     | Room652      |               | Room705      |               | 5th corridor |               |  |
|              | bed-<br>room                            | bath-<br>room | outdoor<br>corridor | bed-<br>room | bath-<br>room | outdoor<br>corridor | bed-<br>room | bath-<br>room | outdoor<br>corridor | bed-<br>room | bath-<br>room | bed-<br>room | bath-<br>room | left<br>side | right<br>side |  |
| 0            | 8720                                    | 9035          | 8291                | 11992        | 12178         | 8744                | 7618         | 8371          | 7033                | 9175         | 9822          | 3694         | 3822          | 8035         | 8311          |  |
| 60           | 47642<br>3                              | 907676        | 91442               | 10253<br>43  | 111685<br>4   | 96565               | 45916<br>3   | 507986        | 84862               | 43530        | 29044         | 4345         | 4415          | 58080        | 40101         |  |
| 180          | 10449<br>04                             | 102176<br>7   | 255410              | 12747<br>96  | 135143<br>6   | 395777              | 38668<br>0   | 477349        | 219625              | 53127        | 41610         | 7982         | 6489          | 34222<br>8   | 10693<br>5    |  |
| 240          | 69566<br>4                              | 612090        | 75738               | 72523<br>1   | 761619        | 123078              | 82573<br>3   | 593950        | 118667              | 43590        | 39668         | 9985         | 9985          | 19377<br>2   | 52249         |  |
